# Supplementary material for: Bacillus megaterium strains derived from water and soil exhibit differential responses to the herbicide mesotrione
Source: PubMed Central journal article supplement (PMC5918998; doi:10.1371/journal.pone.0196166), 2018-04-25
Supplement: pone.0196166.s001.pdf [file pone.0196166.s001.pdf]

## S1 File. Growth rate.

Significant differences are indicated in red.

### Sect 1.1

Growth rate; *B. megaterium* CCT 7729; end of log phase (22h);  
bonferroni means st

|       | Mean      | Std. Dev. |
|-------|-----------|-----------|
| MM    | 5.2289999 | .0890954  |
| MMM   | 5.0429999 | .13777139 |
| MMC   | 4.7640001 | .05992504 |
| Total | 4.984875  | .21671854 |

### Analysis of Variance

| Source         | SS         | df | MS         | F     | Prob > F |
|----------------|------------|----|------------|-------|----------|
| Between groups | .275686568 | 2  | .137843284 | 12.98 | 0.0105   |
| Within groups  | .053081921 | 5  | .010616384 |       |          |
| Total          | .328768489 | 7  | .046966927 |       |          |

Comparison of Growth rate by *B. megaterium* CCT 7729; 22h

(Bonferroni)

| Row Mean-   |       |       |
|-------------|-------|-------|
| Col Mean    | MM    | MMM   |
| -----+----- |       |       |
| MMM         | -.186 |       |
|             | 0.315 |       |
|             |       |       |
| MMC         | -.465 | -.279 |
|             | 0.013 | 0.063 |

**Section 1.2**

Growth rate; *B. megaterium* CCT 7730; end of log phase (22h);  
bonferroni means st

|             | Summary of Growth rate        |           |
|-------------|-------------------------------|-----------|
|             |                               |           |
|             | <i>B. megaterium</i> CCT 7730 |           |
|             | Mean                          | Std. Dev. |
| -----+----- |                               |           |
| MM          | 1.069                         | .0445309  |
| MMM         | 1.335                         | .07607235 |
| MMC         | .78866667                     | .09246258 |
| -----+----- |                               |           |
| Total       | 1.0642222                     | .24506673 |

Analysis of Variance

| Source         | SS         | df | MS         | F     | Prob > F |
|----------------|------------|----|------------|-------|----------|
| Between groups | .447822953 | 2  | .223911476 | 41.16 | 0.0003   |
| Within groups  | .032638665 | 6  | .005439777 |       |          |
| Total          | .480461618 | 8  | .060057702 |       |          |

Comparison of Growth rate by *B. megaterium* CCT 7730; 22h

(Bonferroni)

| Row Mean- |          |          |
|-----------|----------|----------|
| Col Mean  | MM       | MMM      |
| MMM       | .266     |          |
|           | 0.013    |          |
|           |          |          |
| MMC       | -.280333 | -.546333 |
|           | 0.010    | 0.000    |

**Section 1.3**

Growth rate; *B. megaterium* CCT 7729 (L1) x *B. megaterium* CCT 7730 (L2); end of log phase (22h); bonferroni means st

Bartlett's test for equal variances:  $\chi^2(5) = 2.3610$  Prob> $\chi^2 = 0.797$

| Summary of Growth rate

| *B. megaterium* CCT 7729 x *B. megaterium* CCT 7730; 22h

|           Mean     Std. Dev.

|        | Mean      | Std. Dev. |
|--------|-----------|-----------|
| L1 MM  | 5.2289999 | .0890954  |
| L1 MMM | 5.0429999 | .13777139 |
| L1 MMC | 4.7640001 | .05992504 |
| L2 MM  | 1.069     | .0445309  |
| L2 MMM | 1.335     | .07607235 |
| L2 MMC | .78866667 | .09246258 |
| Total  | 2.9092353 | 2.0296571 |

Analysis of Variance

| Source         | SS         | df | MS         | F       | Prob > F |
|----------------|------------|----|------------|---------|----------|
| Between groups | 65.8264085 | 5  | 13.1652817 | 1689.42 | 0.0000   |
| Within groups  | .085720586 | 11 | .007792781 |         |          |
| Total          | 65.9121291 | 16 | 4.11950807 |         |          |

Comparison of Growth rate by *B. megaterium* CCT 7729 x *B. megaterium* CCT 7730; 22h

(Bonferroni)

| Row Mean- |          |          |          |          |          |
|-----------|----------|----------|----------|----------|----------|
| Col Mean  | L1 MM    | L1 MMM   | L1 MMC   | L2 MM    | L2 MMM   |
| L1 MMM    | -.186    |          |          |          |          |
|           | 0.622    |          |          |          |          |
|           |          |          |          |          |          |
| L1 MMC    | -.465    | -.279    |          |          |          |
|           | 0.002    | 0.039    |          |          |          |
|           |          |          |          |          |          |
| L2 MM     | -4.16    | -3.974   | -3.695   |          |          |
|           | 0.000    | 0.000    | 0.000    |          |          |
|           |          |          |          |          |          |
| L2 MMM    | -3.894   | -3.708   | -3.429   | .266     |          |
|           | 0.000    | 0.000    | 0.000    | 0.053    |          |
|           |          |          |          |          |          |
| L2 MMC    | -4.44033 | -4.25433 | -3.97533 | -.280333 | -.546333 |
|           | 0.000    | 0.000    | 0.000    | 0.038    | 0.000    |
