# Supplementary material for: Bacillus megaterium strains derived from water and soil exhibit differential responses to the herbicide mesotrione
Source: PubMed Central journal article supplement (PMC5918998; doi:10.1371/journal.pone.0196166), 2018-04-25
Supplement: pone.0196166.s002.pdf [file pone.0196166.s002.pdf]

## S2 File. Viability.

### Section 2.1

Viability *B. megaterium* CCT 7729 (L1); MM, MMM, and MMC; 3 and 14h;  
bonferroni means st

Bartlett's test for equal variances:  $\chi^2(5) = 9.4599$  Prob> $\chi^2$   
= 0.092

| Summary of Viability |                    |           |
|----------------------|--------------------|-----------|
| L1                   | (LOG de UFC mL -1) |           |
| Treatment            | Mean               | Std. Dev. |
| MM 3                 | 149.915            | 10.486395 |
| MM 14                | 250                | 36.062446 |
| MMM 3                | 125.89             | 1.4547516 |
| MMM 14               | 55.222221          | 33.533288 |
| MMC3                 | 176.25             | 7.4246212 |
| MMC 14               | 299.33334          | 19.79899  |
| Total                | 163.88095          | 85.971661 |

## Analysis of Variance

| Source         | SS         | df | MS         | F     | Prob > F |
|----------------|------------|----|------------|-------|----------|
| Between groups | 91973.8605 | 5  | 18394.7721 | 35.80 | 0.0000   |
| Within groups  | 4110.78485 | 8  | 513.848106 |       |          |
| Total          | 96084.6454 | 13 | 7391.12657 |       |          |

Comparison of Viability (LOG de UFC mL<sup>-1</sup>) by *B. megaterium* CCT 7729 (L1); 3 and 14h Bonferroni)

Row Mean-

Col Mean | MM3 MM14 MMM3 MMM14 MMC3

|       |          |          |          |         |         |
|-------|----------|----------|----------|---------|---------|
| MM14  | 100.085  |          |          |         |         |
|       | 0.034    |          |          |         |         |
| MMM3  | -24.025  | -124.11  |          |         |         |
|       | 1.000    | 0.005    |          |         |         |
| MMM14 | -94.6928 | -194.778 | -70.6678 |         |         |
|       | 0.027    | 0.000    | 0.077    |         |         |
| MMC3  | 26.335   | -73.75   | 50.36    | 121.028 |         |
|       | 1.000    | 0.175    | 0.615    | 0.006   |         |
| MMC14 | 149.418  | 49.3333  | 173.443  | 244.111 | 123.083 |
|       | 0.003    | 0.918    | 0.000    | 0.000   | 0.009   |

## Section 2.2

Viability, by *B. megaterium* CCT 7730 (L2); MM, MMM AND MMC, 3 and 14h

Bartlett's test for equal variances:  $\chi^2(5) = 20.9112$  Prob> $\chi^2 = 0.001$

Viability, by *B. megaterium* CCT 7730 (L2); MM, MMM and MMC; 3 and 14h

Test: Equality of populations (Kruskal-Wallis test)

| L2    | _Obs | _RankSum |
|-------|------|----------|
| MM3   | 2    | 11.00    |
| MM14  | 2    | 25.00    |
| MMM3  | 2    | 15.00    |
| MMM14 | 2    | 20.00    |
| MMC3  | 3    | 9.00     |
| MMC14 | 2    | 11.00    |

chi-squared = 8.967 with 5 d.f.

probability = 0.1104

chi-squared with ties = 8.967 with 5 d.f.

probability = 0.1104

**Section 2.3**

Viability *B. megaterium* CCT 7729 (L1); MM3 X *B. megaterium* CCT 7730 (L2); MM3, MM14 and MMM3, bonferroni means st

Bartlett's test for equal variances:  $\chi^2(3) = 5.8072$  Prob> $\chi^2 = 0.121$

| Summary of Viability |                    |           |
|----------------------|--------------------|-----------|
| L1 x L2              | (LOG de UFC mL -1) |           |
| Treatments           | Mean               | Std. Dev. |
| -----+-----          |                    |           |
| L1 MM3               | 149.915            | 10.486395 |
| L2 MM3               | 83.833332          | 4.4783447 |
| L2 MM14              | 239.25             | .35355339 |
| L2 MMM3              | 127.25             | 1.0606602 |
| -----+-----          |                    |           |
| Total                | 150.06208          | 60.773067 |

| Analysis of Variance |            |    |            |        |          |
|----------------------|------------|----|------------|--------|----------|
| Source               | SS         | df | MS         | F      | Prob > F |
| -----                |            |    |            |        |          |
| Between groups       | 25722.2895 | 3  | 8574.0965  | 261.27 | 0.0000   |
| Within groups        | 131.270049 | 4  | 32.8175122 |        |          |
| -----                |            |    |            |        |          |
| Total                | 25853.5596 | 7  | 3693.36565 |        |          |

Comparison of Viability (LOG de UFC mL<sup>-1</sup>) by *B. megaterium* CCT 7729 (L1); MM3 x *B. megaterium* CCT 7730 (L2); MM3, MM14 and MMM3

(Bonferroni)

| Row Mean- |          |         |         |
|-----------|----------|---------|---------|
| Col Mean  | L1 MM3   | L2 MM3  | L2 MM14 |
| L2 MM3    | -66.0817 |         |         |
|           | 0.002    |         |         |
|           |          |         |         |
| L2 MM14   | 89.335   | 155.417 |         |
|           | 0.001    | 0.000   |         |
|           |          |         |         |
| L2 MMM3   | -22.665  | 43.4167 | -112    |
|           | 0.100    | 0.010   | 0.000   |

#### Section 2.4

Viability; *B. megaterium* CCT 7729 (L1); MM3 X *B. megaterium* CCT 7730 (L2); MMM14, MMC3 and MMC15, bonferroni means st

Bartlett's test for equal variances:  $\chi^2(3) = 9.8573$  Prob> $\chi^2 = 0.020$

Test: Equality of populations (Kruskal-Wallis test)

| L1 X L2  | _Obs | _RankSum |
|----------|------|----------|
| L1 MM3   | 2    | 17.00    |
| L2 MMM14 | 2    | 12.00    |
| L2 MMC3  | 3    | 9.00     |
| L2 MMC14 | 2    | 7.00     |

chi-squared = 5.733 with 3 d.f.

probability = 0.1253

chi-squared with ties = 5.733 with 3 d.f.

probability = 0.1253

### Section 2.5

Viability; *B. megaterium* CCT 7729 (L1); MM14 X *B. megaterium* CCT 7730 (L2); MM3, MM14 and MMM3, bonferroni means st

Bartlett's test for equal variances: chi2(3) = 10.5843 Prob>chi2 = 0.014

Test: Equality of populations (Kruskal-Wallis test)

| L1 X L2 | _Obs | _RankSum |
|---------|------|----------|
| L1 MM14 | 2    | 13.00    |
| L2 MM3  | 2    | 3.00     |
| L2 MM14 | 2    | 13.00    |
| L2 MMM3 | 2    | 7.00     |

chi-squared = 6.000 with 3 d.f.

probability = 0.1116

chi-squared with ties = 6.000 with 3 d.f.

probability = 0.1116

## Section 2.6

Viability; *B. megaterium* CCT 7729 (L1); MM14 x *B. megaterium* CCT 7730 (L2); MMM14, MMC3 and MMC14, bonferroni means st

Bartlett's test for equal variances: chi2(3) = 8.8615 Prob>chi2 = 0.031

Test: Equality of populations (Kruskal-Wallis test)

| L1 x L2  | _Obs | _RankSum |
|----------|------|----------|
| L1 MM14  | 2    | 17.00    |
| L2 MMM14 | 2    | 12.00    |
| L2 MMC3  | 3    | 9.00     |
| L2 MMC14 | 2    | 7.00     |

chi-squared = 5.733 with 3 d.f.

probability = 0.1253

chi-squared with ties = 5.733 with 3 d.f.

probability = 0.1253

### Section 2.7

Viability *B. megaterium* CCT 7729 (L1); MMM3 X *B. megaterium* CCT 7730 (L2); MM3, MM14 and MMM3, bonferroni means st



Bartlett's test for equal variances:  $\chi^2(3) = 4.1104$  Prob> $\chi^2 = 0.250$

| Summary of Viability

| (LOG de UFC mL -1)

| L1 X L2 | Mean      | Std. Dev. |
|---------|-----------|-----------|
| L1 MMM3 | 125.89    | 1.4547516 |
| L2 MM3  | 83.833332 | 4.4783447 |
| L2 MM14 | 239.25    | .35355339 |
| L2 MMM3 | 127.25    | 1.0606602 |
| Total   | 142.03741 | 58.009799 |

Analysis of Variance

| Source         | SS         | df | MS         | F       | Prob > F |
|----------------|------------|----|------------|---------|----------|
| Between groups | 26895.5563 | 3  | 8965.18543 | 1755.25 | 0.0000   |
| Within groups  | 25.5381761 | 5  | 5.10763523 |         |          |
| Total          | 26921.0945 | 8  | 3365.13681 |         |          |

Comparison of Viability (LOG de UFC mL<sup>-1</sup>) by *B. megaterium* CCT 7729 (L1); MMM3 X *B. megaterium* CCT 7730 (L2); MM3, MM14 and MMM3

(Bonferroni)

| Row Mean- | Col Mean | L1 MMM3  | L2 MM3  | L2 MM14 |
|-----------|----------|----------|---------|---------|
| L2 MM3    |          | -42.0567 |         |         |
|           |          | 0.000    |         |         |
| L2 MM14   |          | 113.36   | 155.417 |         |
|           |          | 0.000    | 0.000   |         |
| L2 MMM3   |          | 1.36     | 43.4167 | -112    |
|           |          | 1.000    | 0.000   | 0.000   |

**Section 2.8**

Viability; *B. megaterium* CCT 7729 (L1); MMM3 X *B. megaterium* CCT 7730 (L2); MMM14, MMC3 and MMC14, bonferroni means st

Bartlett's test for equal variances: chi2(3) = 16.9681 Prob>chi2 = 0.001

Test: Equality of populations (Kruskal-Wallis test)

| L1 X L2  | _Obs | _RankSum |
|----------|------|----------|
| L1 MMM3  | 3    | 18.00    |
| L2 MMM14 | 2    | 18.00    |
| L2 MMC3  | 3    | 9.00     |
| L2 MMC14 | 2    | 10.00    |

chi-squared = 4.855 with 3 d.f.

probability = 0.1828

chi-squared with ties = 4.855 with 3 d.f.

probability = 0.1828

## Section 2.9

Viability, *B. megaterium* CCT 7729 (L1); MM14 X *B. megaterium* CCT 7730 (L2); MM3, MM14 and MMM3, bonferroni means st

Bartlett's test for equal variances: chi2(3) = 11.3444 Prob>chi2 = 0.010

Test: Equality of populations (Kruskal-Wallis test)

| L1 X L2  | _Obs | _RankSum |
|----------|------|----------|
| L1 MMM14 | 3    | 8.00     |
| L2 MM3   | 2    | 7.00     |
| L2 MM14  | 2    | 17.00    |
| L2 MMM3  | 2    | 13.00    |

chi-squared = 6.644 with 3 d.f.

probability = 0.0841

chi-squared with ties = 6.644 with 3 d.f.

probability = 0.0841

### Section 2.10

Viability; *B. megaterium* CCT 7729 (L1); MMM14 X *B. megaterium* CCT 7730 (L2) MMM14, MMC3 and MMC14, bonferroni means st

Bartlett's test for equal variances: chi2(3) = 9.2083 Prob>chi2 = 0.027

Viability, by *B. megaterium* CCT 7729 (L1); MMM14 X *B. megaterium* CCT 7730 (L2) MMM14, MMC3 and MMC14

Test: Equality of populations (Kruskal-Wallis test)

| L1 X L2  | _Obs | _RankSum |
|----------|------|----------|
| L1 MMM14 | 3    | 11.00    |
| L2 MMM14 | 2    | 18.00    |
| L2 MMC3  | 3    | 15.00    |
| L2 MMC14 | 2    | 11.00    |

chi-squared = 3.855 with 3 d.f.

probability = 0.2776

chi-squared with ties = 3.855 with 3 d.f.

probability = 0.2776

### Section 2.11

Viability; *B. megaterium* CCT 7729 (L1); MMC3 X *B. megaterium* CCT 7730 (L2) MM3, MM14 and MMM3, bonferroni means st

Bartlett's test for equal variances:  $\chi^2(3) = 4.7675$  Prob> $\chi^2 = 0.190$

| Summary of Viability |           |           |
|----------------------|-----------|-----------|
| (LOG de UFC mL -1)   |           |           |
| L1 X L2              | Mean      | Std. Dev. |
| L1 MMC3              | 176.25    | 7.4246212 |
| L2 MM3               | 83.833332 | 4.4783447 |
| L2 MM14              | 239.25    | .35355339 |
| L2 MMM3              | 127.25    | 1.0606602 |
| Total                | 156.64583 | 61.902602 |

| Analysis of Variance |            |    |            |        |          |
|----------------------|------------|----|------------|--------|----------|
| Source               | SS         | df | MS         | F      | Prob > F |
| Between groups       | 26747.0941 | 3  | 8915.69804 | 466.60 | 0.0000   |
| Within groups        | 76.4305717 | 4  | 19.1076429 |        |          |
| Total                | 26823.5247 | 7  | 3831.9321  |        |          |

Comparison of Viability (LOG de UFC mL -1) by *B. megaterium* CCT 7729 (L1); MMC3 X *B. megaterium* CCT 7730 (L2) MM3, MM14 and MMM3

(Bonferroni)

| Row Mean- |          |         |         |
|-----------|----------|---------|---------|
| Col Mean  | L1 MMC3  | L2 MM3  | L2 MM14 |
| L2 MM3    | -92.4167 |         |         |
|           | 0.000    |         |         |
|           |          |         |         |
| L2 MM14   | 63       | 155.417 |         |
|           | 0.001    | 0.000   |         |
|           |          |         |         |
| L2 MMM3   | -49      | 43.4167 | -112    |
|           | 0.002    | 0.003   | 0.000   |

**Section 2.12**

Viability; *B. megaterium* CCT 7729 (L1); MMC3 X *B. megaterium* CCT 7730 (L2) MMM14, MMC3 and MMC14, bonferroni means st

Bartlett's test for equal variances: chi2(3) = 10.3204 Prob>chi2 = 0.016

Viability, by *B. megaterium* CCT 7729 (L1); MMC3 X *B. megaterium* CCT 7730 (L2) MMM14, MMC3 and MMC14

Test: Equality of populations (Kruskal-Wallis test)

| L1 X L2  | _Obs | _RankSum |
|----------|------|----------|
| L1 MMC3  | 2    | 17.00    |
| L2 MMM14 | 2    | 12.00    |
| L2 MMC3  | 3    | 9.00     |
| L2 MMC14 | 2    | 7.00     |

chi-squared = 5.733 with 3 d.f.

probability = 0.1253

chi-squared with ties = 5.733 with 3 d.f.

probability = 0.1253

### Section 2.13

Viability; *B. megaterium* CCT 7729 (L1); MMC14 X *B. megaterium* CCT 7730 (L2) MM3, MM14 and MMM3; bonferroni means st

Bartlett's test for equal variances: chi2(3) = 8.1483 Prob>chi2 = 0.043

Viability, by *B. megaterium* CCT 7729 (L1); MMC14 X *B. megaterium* CCT 7730 (L2) MM3, MM14 and MMM3



Test: Equality of populations (Kruskal-Wallis test)

| L1 X L2  | _Obs | _RankSum |
|----------|------|----------|
| L1 MMC14 | 2    | 15.00    |
| L2 MM3   | 2    | 3.00     |
| L2 MM14  | 2    | 11.00    |
| L2 MMM3  | 2    | 7.00     |

chi-squared = 6.667 with 3 d.f.

probability = 0.0833

chi-squared with ties = 6.667 with 3 d.f.

probability = 0.0833

### Section 2.14

Viability; *B. megaterium* CCT 7729 (L1); MMC14 X *B. megaterium* CCT 7730 (L2) MMM14, MMC3 and MMC14; bonferroni means st

Bartlett's test for equal variances: chi2(3) = 9.1364 Prob>chi2 = 0.028

Viability, by *B. megaterium* CCT 7729 (L1); MMC14 X *B. megaterium* CCT 7730 (L2) MMM14, MMC3 and MMC14

Test: Equality of populations (Kruskal-Wallis test)

| L1 X L2  | _Obs | _RankSum |
|----------|------|----------|
| L1 MMC14 | 2    | 17.00    |
| L2 MMM14 | 2    | 12.00    |
| L2 MMC3  | 3    | 9.00     |
| L2 MMC14 | 2    | 7.00     |

chi-squared = 5.733 with 3 d.f.

probability = 0.1253

chi-squared with ties = 5.733 with 3 d.f.

probability = 0.1253
