# Supplementary material for: Bacillus megaterium strains derived from water and soil exhibit differential responses to the herbicide mesotrione
Source: PubMed Central journal article supplement (PMC5918998; doi:10.1371/journal.pone.0196166), 2018-04-25
Supplement: pone.0196166.s003.pdf [file pone.0196166.s003.pdf]

### S3 File. Peroxide.

#### Section 3.1

Peroxide, *B. megaterium* CCT 7729 (L1); MM, MMM and MMC; 3 and 14h;  
bonferroni means st

Bartlett's test for equal variances:  $\chi^2(5) = 3.6281$  Prob> $\chi^2$   
= 0.604

|             | Summary of peroxide |           |
|-------------|---------------------|-----------|
|             | (mMol de H2O2/106   |           |
| L1          | U.F.C.)             |           |
|             | Mean                | Std. Dev. |
| -----+----- |                     |           |
| L1 MM3      | .043662             | .02058246 |
| L1 MM14     | 1.324414            | .10291232 |
| L1 MMM3     | .69859198           | .08232986 |
| L1 MMM14    | .28622867           | .0343041  |
| L1 MMC3     | 3.871364            | .04116483 |
| L1 MMC14    | 1.193428            | .01372167 |
| -----+----- |                     |           |
| Total       | 1.2362815           | 1.319624  |

## Analysis of Variance

| Source         | SS         | df | MS         | F       | Prob > F |
|----------------|------------|----|------------|---------|----------|
| Between groups | 19.1346304 | 5  | 3.82692608 | 1101.15 | 0.0000   |
| Within groups  | .020852388 | 6  | .003475398 |         |          |
| Total          | 19.1554828 | 11 | 1.74140753 |         |          |

Comparison of peroxide ((mMol de H2O2/106 U.F.C.) by *B. megaterium* CCT 7729 (L1); MM, MMM and MMC, 3 and 14h (Bonferroni)

Row Mean-

Col Mean | L1 MM3 L1 MM14 L1 MMM3 L1 MMM14 L1 MMC3

|          |         |          |          |         |          |
|----------|---------|----------|----------|---------|----------|
| L1 MM14  | 1.28075 |          |          |         |          |
|          | 0.000   |          |          |         |          |
| L1 MMM3  | .65493  | -.625822 |          |         |          |
|          | 0.000   | 0.001    |          |         |          |
| L1 MMM14 | .242567 | -1.03819 | -.412363 |         |          |
|          | 0.094   | 0.000    | 0.006    |         |          |
| L1 MMC3  | 3.8277  | 2.54695  | 3.17277  | 3.58514 |          |
|          | 0.000   | 0.000    | 0.000    | 0.000   |          |
| L1 MMC14 | 1.14977 | -.130986 | .494836  | .907199 | -2.67794 |
|          | 0.000   | 1.000    | 0.002    | 0.000   | 0.000    |

### Section 3.2

Peroxide; *B. megaterium* CCT 7730 (L2); MM, MMM and MMC; 3 and 14h;  
bonferroni means st

Bartlett's test for equal variances:  $\chi^2(5) = 1.8165$  Prob> $\chi^2 = 0.874$

|             |       | Summary of peroxide |           |
|-------------|-------|---------------------|-----------|
|             |       | (mMol de H2O2/106   |           |
| L2          |       | U.F.C.)             |           |
|             |       | Mean                | Std. Dev. |
| -----+----- |       |                     |           |
| L2          | MM3   | .33474199           | .02058248 |
| L2          | MM14  | 1.4133551           | .09015305 |
| L2          | MMM3  | .98967203           | .08232986 |
| L2          | MMM14 | 1.3001574           | .05488658 |
| L2          | MMC3  | 5.8216              | .08232999 |
| L2          | MMC14 | 1.484508            | .04116491 |
| -----+----- |       |                     |           |
|             | Total | 1.8539557           | 1.8050414 |

## Analysis of Variance

| Source         | SS         | df | MS         | F       | Prob > F |
|----------------|------------|----|------------|---------|----------|
| Between groups | 39.0631501 | 5  | 7.81263002 | 1565.11 | 0.0000   |
| Within groups  | .034942303 | 7  | .004991758 |         |          |
| Total          | 39.0980924 | 12 | 3.25817437 |         |          |

Comparison of peroxide ((mMol de H2O2/106 U.F.C.) by *B. megaterium* CCT 7730 (L2); MM, MMM and MMC 3 and 14h (Bonferroni)

Row Mean-

Col Mean | L2 MM3 L2 MM14 L2 MMM3 L2 MMM14 L2 MMC3

|          |         |          |         |         |          |
|----------|---------|----------|---------|---------|----------|
| L2 MM14  | 1.07861 |          |         |         |          |
|          | 0.000   |          |         |         |          |
|          |         |          |         |         |          |
| L2 MMM3  | .65493  | -.423683 |         |         |          |
|          | 0.001   | 0.005    |         |         |          |
|          |         |          |         |         |          |
| L2 MMM14 | .965415 | -.113198 | .310485 |         |          |
|          | 0.000   | 1.000    | 0.048   |         |          |
|          |         |          |         |         |          |
| L2 MMC3  | 5.48686 | 4.40824  | 4.83193 | 4.52144 |          |
|          | 0.000   | 0.000    | 0.000   | 0.000   |          |
|          |         |          |         |         |          |
| L2 MMC14 | 1.14977 | .071153  | .494836 | .184351 | -4.33709 |
|          | 0.000   | 1.000    | 0.003   | 0.524   | 0.000    |

### Section 3.3

Peroxide; *B. megaterium* CCT 7729 (L1); MM3 X *B. megaterium* CCT 7730 (L2); MM3, MM14, MMM3; bonferroni means st

Bartlett's test for equal variances:  $\chi^2(3) = 2.5110$  Prob> $\chi^2 = 0.473$

| Summary of peroxide |  | (mMol de H2O2/106 |           |
|---------------------|--|-------------------|-----------|
| U.F.C.)             |  | Mean              | Std. Dev. |
| L1 MM3              |  | .043662           | .02058246 |
| L2 MM3              |  | .33474199         | .02058248 |
| L2 MM14             |  | 1.4133551         | .09015305 |
| L2 MMM3             |  | .98967203         | .08232986 |
| Total               |  | .77513527         | .59117522 |

#### Analysis of Variance

| Source         | SS         | df | MS         | F      | Prob > F |
|----------------|------------|----|------------|--------|----------|
| Between groups | 2.77202451 | 3  | .924008169 | 193.46 | 0.0000   |
| Within groups  | .023880627 | 5  | .004776125 |        |          |
| Total          | 2.79590513 | 8  | .349488142 |        |          |

Comparison of peroxide ((mMol de H2O2/106 U.F.C.)

by *B. megaterium* CCT 7729 (L1); MM3 X *B. megaterium* CCT 7730 (L2); MM3, MM14, MMM3;

(Bonferroni)

| Row Mean- |         |         |          |
|-----------|---------|---------|----------|
| Col Mean  | L1 MM3  | L2 MM3  | L2 MM14  |
| L2 MM3    | .29108  |         |          |
|           | 0.050   |         |          |
|           |         |         |          |
| L2 MM14   | 1.36969 | 1.07861 |          |
|           | 0.000   | 0.000   |          |
|           |         |         |          |
| L2 MMM3   | .94601  | .65493  | -.423683 |
|           | 0.000   | 0.001   | 0.007    |

**Section 3.4**

Peroxide; *B. megaterium* CCT 7729 (L1); MM3 X *B. megaterium* CCT 7730 (L2); MMM14, MMC3 and MMC14; bonferroni means st

Bartlett's test for equal variances:  $\chi^2(3) = 1.1851$  Prob> $\chi^2 = 0.757$

| Summary of peroxide |           |           |
|---------------------|-----------|-----------|
| ( (mMol de H2O2/106 |           |           |
| U.F.C.)             |           |           |
|                     | Mean      | Std. Dev. |
| L1 MM3              | .043662   | .02058246 |
| L2 MMM14            | 1.3001574 | .05488658 |
| L2 MMC3             | 5.8216    | .08232999 |
| L2 MMC14            | 1.484508  | .04116491 |
| Total               | 2.1624818 | 2.3353036 |

#### Analysis of Variance

| Source         | SS         | df | MS         | F       | Prob > F |
|----------------|------------|----|------------|---------|----------|
| Between groups | 38.16359   | 3  | 12.7211967 | 4272.82 | 0.0000   |
| Within groups  | .011908951 | 4  | .002977238 |         |          |
| Total          | 38.1754989 | 7  | 5.4536427  |         |          |

Comparison of peroxide ((mMol de H2O2/106 U.F.C.)

by *B. megaterium* CCT 7729 (L1); MM3 X *B. megaterium* CCT 7730 (L2); MMM14, MMC3 and MMC14

(Bonferroni)

| Row Mean- |         |          |          |
|-----------|---------|----------|----------|
| Col Mean  | L1 MM3  | L2 MMM14 | L2 MMC3  |
| L2 MMM14  | 1.2565  |          |          |
|           | 0.000   |          |          |
|           |         |          |          |
| L2 MMC3   | 5.77794 | 4.52144  |          |
|           | 0.000   | 0.000    |          |
|           |         |          |          |
| L2 MMC14  | 1.44085 | .184351  | -4.33709 |
|           | 0.000   | 0.167    | 0.000    |

**Section 3.5**

Peroxide; *B. megaterium* CCT 7729 (L1); MM14 X *B. megaterium* CCT 7730 (L2); MM3, MM14 and MMM 3; bonferroni means st



Bartlett's test for equal variances:  $\chi^2(3) = 1.4534$  Prob> $\chi^2 = 0.693$

| Summary of peroxide<br>( (mMol de H2O2/106<br>U.F.C.) |           |           |
|-------------------------------------------------------|-----------|-----------|
| L1 X L2                                               | Mean      | Std. Dev. |
| L1 MM14                                               | 1.324414  | .10291232 |
| L2 MM3                                                | .33474199 | .02058248 |
| L2 MM14                                               | 1.4133551 | .09015305 |
| L2 MMM3                                               | .98967203 | .08232986 |
| Total                                                 | 1.0597468 | .44865727 |

| Analysis of Variance |            |    |            |       |          |
|----------------------|------------|----|------------|-------|----------|
| Source               | SS         | df | MS         | F     | Prob > F |
| Between groups       | 1.57629886 | 3  | .525432955 | 77.16 | 0.0001   |
| Within groups        | .034047935 | 5  | .006809587 |       |          |
| Total                | 1.6103468  | 8  | .20129335  |       |          |

Comparison of peroxide ((mMol de H2O2/106 U.F.C.) by *B. megaterium* CCT 7729 (L1); MM14 X *B. megaterium* CCT 7730 (L2); MM3, MM14 and MMM 3

(Bonferroni)

| Row Mean- | Col Mean | L1 MM14  | L2 MM3  | L2 MM14  |
|-----------|----------|----------|---------|----------|
| L2 MM3    |          | -.989672 |         |          |
|           |          | 0.000    |         |          |
| L2 MM14   |          | .088941  | 1.07861 |          |
|           |          | 1.000    | 0.000   |          |
| L2 MMM3   |          | -.334742 | .65493  | -.423683 |
|           |          | 0.059    | 0.003   | 0.015    |

**Section 3.6**

Peroxide; *B. megaterium* CCT 7729 (L1); MM14 x *B. megaterium* CCT 7730 (L2); MMM14, MMC3 and MMC14; bonferroni means st

Bartlett's test for equal variances:  $\chi^2(3) = 0.6557$  Prob> $\chi^2 = 0.884$

| Summary of peroxide<br>( (mMol de H2O2/106<br>U.F.C.) |           |           |
|-------------------------------------------------------|-----------|-----------|
|                                                       | Mean      | Std. Dev. |
| L1 MM14                                               | 1.324414  | .10291232 |
| L2 MMM14                                              | 1.3001574 | .05488658 |
| L2 MMC3                                               | 5.8216    | .08232999 |
| L2 MMC14                                              | 1.484508  | .04116491 |
| Total                                                 | 2.4826698 | 2.0629876 |

#### Analysis of Variance

| Source         | SS         | df | MS         | F       | Prob > F |
|----------------|------------|----|------------|---------|----------|
| Between groups | 29.7693475 | 3  | 9.92311584 | 1797.97 | 0.0000   |
| Within groups  | .022076259 | 4  | .005519065 |         |          |
| Total          | 29.7914238 | 7  | 4.25591768 |         |          |

Comparison of peroxide ((mMol de H2O2/106 U.F.C.) by *B. megaterium* CCT 7729 (L1); MM14 x *B. megaterium* CCT 7730 (L2); MMM14, MMC3 and MMC14

(Bonferroni)

| Row Mean- |          |          |          |  |
|-----------|----------|----------|----------|--|
| Col Mean  | L1 MM14  | L2 MMM14 | L2 MMC3  |  |
| L2 MMM14  | -.024257 |          |          |  |
|           | 1.000    |          |          |  |
|           |          |          |          |  |
| L2 MMC3   | 4.49719  | 4.52144  |          |  |
|           | 0.000    | 0.000    |          |  |
|           |          |          |          |  |
| L2 MMC14  | .160094  | .184351  | -4.33709 |  |
|           | 0.585    | 0.409    | 0.000    |  |

**Section 3.7**

Peroxide; *B. megaterium* CCT 7729 (L1);\_MMM3 X *B. megaterium* CCT 7730 (L2); MM3, MM14 and MMM3; bonferroni means st

Bartlett's test for equal variances:  $\chi^2(3) = 1.3454$  Prob> $\chi^2 = 0.718$

| Summary of peroxide<br>( (mMol de H2O2/106<br>U.F.C.) |           |           |
|-------------------------------------------------------|-----------|-----------|
| L1 X L2                                               | Mean      | Std. Dev. |
| L1 MMM3                                               | .69859198 | .08232986 |
| L2 MM3                                                | .33474199 | .02058248 |
| L2 MM14                                               | 1.4133551 | .09015305 |
| L2 MMM3                                               | .98967203 | .08232986 |
| Total                                                 | .92067526 | .4406294  |

| Analysis of Variance |            |    |            |       |          |
|----------------------|------------|----|------------|-------|----------|
| Source               | SS         | df | MS         | F     | Prob > F |
| Between groups       | 1.52299897 | 3  | .507666324 | 83.95 | 0.0001   |
| Within groups        | .030235196 | 5  | .006047039 |       |          |
| Total                | 1.55323417 | 8  | .194154271 |       |          |

Comparison of peroxide ((mMol de H2O2/106 U.F.C.) by *B. megaterium* CCT 7729 (L1);\_MMM3 X *B. megaterium* CCT 7730 (L2); MM3, MM14 and MMM3

(Bonferroni)

| Row Mean- | Col Mean | L1 MMM3 | L2 MM3  | L2 MM14  |
|-----------|----------|---------|---------|----------|
| L2 MM3    |          | -.36385 |         |          |
|           |          | 0.033   |         |          |
| L2 MM14   |          | .714763 | 1.07861 |          |
|           |          | 0.001   | 0.000   |          |
| L2 MMM3   |          | .29108  | .65493  | -.423683 |
|           |          | 0.080   | 0.002   | 0.011    |

**Section 3.8**

Peroxide; *B. megaterium* CCT 7729 (L1);\_MMM3 X *B. megaterium* CCT 7730 (L2); MMM14, MMC3 and MMC14; bonferroni means st

Bartlett's test for equal variances:  $\chi^2(3) = 0.4354$  Prob> $\chi^2 = 0.933$

| Summary of peroxide<br>( (mMol de H2O2/106<br>U.F.C.) |           |           |
|-------------------------------------------------------|-----------|-----------|
|                                                       | Mean      | Std. Dev. |
| L1 X L2                                               |           |           |
| L1 MMM3                                               | .69859198 | .08232986 |
| L2 MMM14                                              | 1.3001574 | .05488658 |
| L2 MMC3                                               | 5.8216    | .08232999 |
| L2 MMC14                                              | 1.484508  | .04116491 |
| Total                                                 | 2.3262143 | 2.1802536 |

#### Analysis of Variance

| Source         | SS         | df | MS         | F       | Prob > F |
|----------------|------------|----|------------|---------|----------|
| Between groups | 33.2562754 | 3  | 11.0854251 | 2427.88 | 0.0000   |
| Within groups  | .01826352  | 4  | .00456588  |         |          |
| Total          | 33.2745389 | 7  | 4.75350556 |         |          |

Comparison of peroxide ((mMol de H2O2/106 U.F.C.) by *B. megaterium* CCT 7729 (L1);\_MMM3 X *B. megaterium* CCT 7730 (L2); MMM14, MMC3 and MMC14

(Bonferroni)

| Row Mean- | Col Mean | L1 MMM3 | L2 MMM14 | L2 MMC3  |
|-----------|----------|---------|----------|----------|
| L2 MMM14  |          | .601565 |          |          |
|           |          | 0.005   |          |          |
| L2 MMC3   |          | 5.12301 | 4.52144  |          |
|           |          | 0.000   | 0.000    |          |
| L2 MMC14  |          | .785916 | .184351  | -4.33709 |
|           |          | 0.002   | 0.315    | 0.000    |

**Section 3.9**

Peroxide; *B. megaterium* CCT 7729 (L1); MMM14 X *B. megaterium* CCT 7730 (L2); MM3, MM14 and MMM3; bonferroni means st



Bartlett's test for equal variances:  $\chi^2(3) = 1.8770$  Prob> $\chi^2 = 0.598$

| Summary of peroxide<br>( (mMol de H2O2/106<br>U.F.C.) |           |           |
|-------------------------------------------------------|-----------|-----------|
| L1 X L2                                               | Mean      | Std. Dev. |
| L1 MMM14                                              | .28622867 | .0343041  |
| L2 MM3                                                | .33474199 | .02058248 |
| L2 MM14                                               | 1.4133551 | .09015305 |
| L2 MMM3                                               | .98967203 | .08232986 |
| Total                                                 | .82903897 | .52183101 |

#### Analysis of Variance

| Source         | SS         | df | MS         | F      | Prob > F |
|----------------|------------|----|------------|--------|----------|
| Between groups | 2.15382706 | 3  | .717942355 | 145.72 | 0.0000   |
| Within groups  | .02463376  | 5  | .004926752 |        |          |
| Total          | 2.17846082 | 8  | .272307603 |        |          |

Comparison of peroxide ((mMol de H2O2/106 U.F.C.) by *B. megaterium* CCT 7729 (L1); MMM14 X *B. megaterium* CCT 7730 (L2); MM3, MM14 and MMM3

(Bonferroni)

| Row Mean- | Col Mean | L1 MMM14 | L2 MM3  | L2 MM14  |
|-----------|----------|----------|---------|----------|
| L2 MM3    |          | .048513  |         |          |
|           |          | 1.000    |         |          |
| L2 MM14   |          | 1.12713  | 1.07861 |          |
|           |          | 0.000    | 0.000   |          |
| L2 MMM3   |          | .703443  | .65493  | -.423683 |
|           |          | 0.001    | 0.001   | 0.007    |

**Section 3.10**

Peroxide; *B. megaterium* CCT 7729 (L1); MMM14 X *B. megaterium* CCT 7730 (L2);\_ MMM14, MMC3 and MMC14; bonferroni means st

Bartlett's test for equal variances:  $\chi^2(3) = 0.6371$  Prob> $\chi^2 = 0.888$

| Summary of peroxide<br>( (mMol de H2O2/106<br>U.F.C.) |           |           |
|-------------------------------------------------------|-----------|-----------|
|                                                       | Mean      | Std. Dev. |
| L1 X L2                                               |           |           |
| L1 MMM14                                              | .28622867 | .0343041  |
| L2 MMM14                                              | 1.3001574 | .05488658 |
| L2 MMC3                                               | 5.8216    | .08232999 |
| L2 MMC14                                              | 1.484508  | .04116491 |
| Total                                                 | 2.2231235 | 2.2743504 |

#### Analysis of Variance

| Source         | SS         | df | MS         | F       | Prob > F |
|----------------|------------|----|------------|---------|----------|
| Between groups | 36.1960276 | 3  | 12.0653425 | 3811.49 | 0.0000   |
| Within groups  | .012662085 | 4  | .003165521 |         |          |
| Total          | 36.2086896 | 7  | 5.17266995 |         |          |

Comparison of peroxide ((mMol de H2O2/106 U.F.C.) by *B. megaterium* CCT 7729 (L1); MMM14 X *B. megaterium* CCT 7730 (L2);\_MMM14, MMC3 and MMC14

(Bonferroni)

| Row Mean- | Col Mean | L1 MMM14 | L2 MMM14 | L2 MMC3  |
|-----------|----------|----------|----------|----------|
| L2 MMM14  |          | 1.01393  |          |          |
|           |          | 0.000    |          |          |
| L2 MMC3   |          | 5.53537  | 4.52144  |          |
|           |          | 0.000    | 0.000    |          |
| L2 MMC14  |          | 1.19828  | .184351  | -4.33709 |
|           |          | 0.000    | 0.184    | 0.000    |

**Section 3.11**

Peroxide; *B. megaterium* CCT 7729 (L1); MMC3 X *B. megaterium* CCT 7730 (L2);\_MM3, MM14 and MMM3; bonferroni means st

Bartlett's test for equal variances:  $\chi^2(3) = 1.6863$  Prob> $\chi^2 = 0.640$

| Summary of peroxide<br>( (mMol de H2O2/106<br>U.F.C.) |           |           |
|-------------------------------------------------------|-----------|-----------|
| L1 X L2                                               | Mean      | Std. Dev. |
| L1 MMC3                                               | 3.871364  | .04116483 |
| L2 MM3                                                | .33474199 | .02058248 |
| L2 MM14                                               | 1.4133551 | .09015305 |
| L2 MMM3                                               | .98967203 | .08232986 |
| Total                                                 | 1.6257357 | 1.3411117 |

| Analysis of Variance |            |    |            |        |          |
|----------------------|------------|----|------------|--------|----------|
| Source               | SS         | df | MS         | F      | Prob > F |
| Between groups       | 14.3634929 | 3  | 4.78783097 | 951.80 | 0.0000   |
| Within groups        | .025151532 | 5  | .005030306 |        |          |
| Total                | 14.3886444 | 8  | 1.79858056 |        |          |

Comparison of peroxide ((mMol de H2O2/106 U.F.C.) by *B. megaterium* CCT 7729 (L1); MMC3 X *B. megaterium* CCT 7730 (L2); \_MM3, MM14 and MMM3

(Bonferroni)

| Row Mean- | Col Mean | L1 MMC3  | L2 MM3  | L2 MM14  |
|-----------|----------|----------|---------|----------|
| L2 MM3    |          | -3.53662 |         |          |
|           |          | 0.000    |         |          |
| L2 MM14   |          | -2.45801 | 1.07861 |          |
|           |          | 0.000    | 0.000   |          |
| L2 MMM3   |          | -2.88169 | .65493  | -.423683 |
|           |          | 0.000    | 0.002   | 0.007    |

**Section 3.12**

Peroxide; *B. megaterium* CCT 7729 (L1); MMC3 X *B. megaterium* CCT 7730 (L2); MMM14, MMC3 and MMC14; bonferroni means st

Bartlett's test for equal variances:  $\chi^2(3) = 0.4929$  Prob> $\chi^2 = 0.920$

| Summary of peroxide<br>(mMol de H2O2/106<br>U.F.C.) |           |           |
|-----------------------------------------------------|-----------|-----------|
|                                                     | Mean      | Std. Dev. |
| L1 MMC3                                             | 3.871364  | .04116483 |
| L2 MMM14                                            | 1.3001574 | .05488658 |
| L2 MMC3                                             | 5.8216    | .08232999 |
| L2 MMC14                                            | 1.484508  | .04116491 |
| Total                                               | 3.1194073 | 1.9897193 |

#### Analysis of Variance

| Source         | SS         | df | MS         | F       | Prob > F |
|----------------|------------|----|------------|---------|----------|
| Between groups | 27.6997003 | 3  | 9.23323344 | 2802.23 | 0.0000   |
| Within groups  | .013179857 | 4  | .003294964 |         |          |
| Total          | 27.7128802 | 7  | 3.95898288 |         |          |

Comparison of peroxide ((mMol de H2O2/106 U.F.C.) by *B. megaterium* CCT 7729 (L1); MMC3 X *B. megaterium* CCT 7730 (L2); MMM14, MMC3 and MMC14

(Bonferroni)

| Row Mean- | Col Mean | L1 MMC3  | L2 MMM14 | L2 MMC3  |
|-----------|----------|----------|----------|----------|
| L2 MMM14  |          | -2.57121 |          |          |
|           |          | 0.000    |          |          |
| L2 MMC3   |          | 1.95024  | 4.52144  |          |
|           |          | 0.000    | 0.000    |          |
| L2 MMC14  |          | -2.38686 | .184351  | -4.33709 |
|           |          | 0.000    | 0.195    | 0.000    |

**Section 3.13**

Peroxide; *B. megaterium* CCT 7729 (L1); MMC14 X *B. megaterium* CCT 7730 (L2); MM3, MM14 and MMM3; bonferroni means st



Bartlett's test for equal variances:  $\chi^2(3) = 3.0681$  Prob> $\chi^2 = 0.381$

| Summary of peroxide<br>( (mMol de H2O2/106<br>U.F.C.) |           |           |
|-------------------------------------------------------|-----------|-----------|
| L1 X L2                                               | Mean      | Std. Dev. |
| L1 MMC14                                              | 1.193428  | .01372167 |
| L2 MM3                                                | .33474199 | .02058248 |
| L2 MM14                                               | 1.4133551 | .09015305 |
| L2 MMM3                                               | .98967203 | .08232986 |
| Total                                                 | 1.0306388 | .43127175 |

| Analysis of Variance |            |    |            |        |          |
|----------------------|------------|----|------------|--------|----------|
| Source               | SS         | df | MS         | F      | Prob > F |
| Between groups       | 1.46431728 | 3  | .488105759 | 103.21 | 0.0001   |
| Within groups        | .023645273 | 5  | .004729055 |        |          |
| Total                | 1.48796255 | 8  | .185995319 |        |          |

Comparison of peroxide ((mMol de H2O2/106 U.F.C.) by *B. megaterium* CCT 7729 (L1); MMC14 X *B. megaterium* CCT 7730 (L2); MM3, MM14 and MMM3

(Bonferroni)

| Row Mean- | Col Mean | L1 MMC14 | L2 MM3  | L2 MM14  |
|-----------|----------|----------|---------|----------|
| L2 MM3    |          | -.858686 |         |          |
|           |          | 0.000    |         |          |
| L2 MM14   |          | .219927  | 1.07861 |          |
|           |          | 0.103    | 0.000   |          |
| L2 MMM3   |          | -.203756 | .65493  | -.423683 |
|           |          | 0.188    | 0.001   | 0.007    |

**Section 3.14**

Peroxide; *B. megaterium* CCT 7729 (L1); MMC14 X *B. megaterium* CCT 7730 (L2); MMM14, MMC3 and MMC14; bonferroni means st

Bartlett's test for equal variances:  $\chi^2(3) = 1.7012$  Prob> $\chi^2 = 0.637$

| Summary of peroxide<br>(mMol de H2O2/106<br>U.F.C.) |           |           |
|-----------------------------------------------------|-----------|-----------|
|                                                     | Mean      | Std. Dev. |
| L1 MMC14                                            | 1.193428  | .01372167 |
| L2 MMM14                                            | 1.3001574 | .05488658 |
| L2 MMC3                                             | 5.8216    | .08232999 |
| L2 MMC14                                            | 1.484508  | .04116491 |
| Total                                               | 2.4499233 | 2.084419  |

#### Analysis of Variance

| Source         | SS         | df | MS         | F       | Prob > F |
|----------------|------------|----|------------|---------|----------|
| Between groups | 30.4019446 | 3  | 10.1339815 | 3472.45 | 0.0000   |
| Within groups  | .011673598 | 4  | .002918399 |         |          |
| Total          | 30.4136182 | 7  | 4.34480259 |         |          |

Supplementary Material

Comparison of peroxide ((mMol de H2O2/106 U.F.C.) by *B. megaterium* CCT 7729 (L1) MMC14 X *B. megaterium* CCT 7730 (L2) MMM14, MMC3 and MMC14

(Bonferroni)

| Row Mean- |          |          |          |  |
|-----------|----------|----------|----------|--|
| Col Mean  | L1 MMC14 | L2 MMM14 | L2 MMC3  |  |
| L2 MMM14  | .106729  |          |          |  |
|           | 0.716    |          |          |  |
|           |          |          |          |  |
| L2 MMC3   | 4.62817  | 4.52144  |          |  |
|           | 0.000    | 0.000    |          |  |
|           |          |          |          |  |
| L2 MMC14  | .29108   | .184351  | -4.33709 |  |
|           | 0.034    | 0.162    | 0.000    |  |
