# Supplementary material for: Bacillus megaterium strains derived from water and soil exhibit differential responses to the herbicide mesotrione
Source: PubMed Central journal article supplement (PMC5918998; doi:10.1371/journal.pone.0196166), 2018-04-25
Supplement: pone.0196166.s004.pdf [file pone.0196166.s004.pdf]

## S4 File. MDA.

### Section 4.1

MDA; *B. megaterium* CCT 7729 (L1); MM, MMM and MMC; 3 and 14h;  
bonferroni means st

Bartlett's test for equal variances:  $\chi^2(5) = 4.2097$  Prob> $\chi^2$   
= 0.520

|             | Summary of MDA      |           |
|-------------|---------------------|-----------|
| L1          | (nmol/fresh weight) |           |
|             | Mean                | Std. Dev. |
| -----+----- |                     |           |
| L1 MM3      | 1.7825              | .10960153 |
| L1 MM14     | .43916667           | .04474465 |
| L1 MMM3     | 2.2475001           | .10960153 |
| L1 MMM14    | .77500001           | .10960157 |
| L1 MMC3     | 2.17                | .32880459 |
| L1 MMC14    | .27124999           | .16440232 |
| -----+----- |                     |           |
| Total       | 1.2161539           | .85389892 |

Analysis of Variance

| Source         | SS         | df | MS         | F     | Prob > F |
|----------------|------------|----|------------|-------|----------|
| Between groups | 8.57453807 | 5  | 1.71490761 | 68.52 | 0.0000   |
| Within g       | .175182246 | 7  | .025026035 |       |          |
| Total          | 8.74972032 | 12 | .72914336  |       |          |

Comparison of MDA (nmol/fresh weight) by *B. megaterium* CCT 7729 (L1); MM, MMM and MMC; 3 and 14h

(Bonferroni)

Row Mean-

Col Mean | L1 MM3 L1 MM14 L1 MMM3 L1 MMM14 L1 MMC3

|          |          |          |          |         |          |
|----------|----------|----------|----------|---------|----------|
| L1 MM14  | -1.34333 |          |          |         |          |
|          | 0.001    |          |          |         |          |
| L1 MMM3  | .465     | 1.80833  |          |         |          |
|          | 0.326    | 0.000    |          |         |          |
| L1 MMM14 | -1.0075  | .335833  | -1.4725  |         |          |
|          | 0.006    | 0.794    | 0.001    |         |          |
| L1 MMC3  | .3875    | 1.73083  | -.0775   | 1.395   |          |
|          | 0.662    | 0.000    | 1.000    | 0.001   |          |
| L1 MMC14 | -1.51125 | -.167917 | -1.97625 | -.50375 | -1.89875 |
|          | 0.000    | 1.000    | 0.000    | 0.231   | 0.000    |

**Section 4.2**

MDA; *B. megaterium* CCT 7730 (L2); MM, MMM and MMC; 3 and 14h;  
 bonferroni means st

Bartlett's test for equal variances:  $\chi^2(4) = 0.7066$  Prob> $\chi^2 = 0.951$

| Summary of MDA |                     |           |
|----------------|---------------------|-----------|
| L2             | (nmol/fresh weight) |           |
|                | Mean                | Std. Dev. |
| L2 MM3         | 1.55                | 0         |
| L2 MM14        | 1.395               | .10960153 |
| L2 MMM3        | .89125001           | .05480077 |
| L2 MMM14       | 1.705               | .10960153 |
| L2 MMC3        | .50375001           | .05480079 |
| L2 MMC14       | 1.3175              | .10960153 |
| Total          | 1.2270833           | .43192333 |

| Analysis of Variance |            |    |            |       |          |
|----------------------|------------|----|------------|-------|----------|
| Source               | SS         | df | MS         | F     | Prob > F |
| Between groups       | 2.01009162 | 5  | .402018324 | 57.37 | 0.0001   |
| Within groups        | .042043737 | 6  | .007007289 |       |          |
| Total                | 2.05213536 | 11 | .18655776  |       |          |

Comparison of MDA (nmol/fresh weight) by *B. megaterium* CCT 7730 (L2); MM, MMM and MMC; 3 and 14h

(Bonferroni)

| Row Mean- |          |         |         |          |         |
|-----------|----------|---------|---------|----------|---------|
| Col Mean  | L2 MM3   | L2 MM14 | L2 MMM3 | L2 MMM14 | L2 MMC3 |
| L2 MM14   | -.155    |         |         |          |         |
|           | 1.000    |         |         |          |         |
| L2 MMM3   | -.65875  | -.50375 |         |          |         |
|           | 0.003    | 0.014   |         |          |         |
| L2 MMM14  | .155     | .31     | .81375  |          |         |
|           | 1.000    | 0.151   | 0.001   |          |         |
| L2 MMC3   | -1.04625 | -.89125 | -.3875  | -1.20125 |         |
|           | 0.000    | 0.001   | 0.054   | 0.000    |         |
| L2 MMC14  | -.2325   | -.0775  | .42625  | -.3875   | .81375  |
|           | 0.482    | 1.000   | 0.034   | 0.054    | 0.001   |

### Section 4.3

MDA; *B. megaterium* CCT 7729 (L1); MM3 X *B. megaterium* CCT 7730 (L2); MM3, MM14 and MMM3; bonferroni means st

Bartlett's test for equal variances:  $\chi^2(2) = 0.3622$  Prob> $\chi^2 = 0.834$

| Summary of MDA |                     |           |
|----------------|---------------------|-----------|
| L1 x L2        | (nmol/fresh weight) |           |
|                | Mean                | Std. Dev. |
| L1 MM3         | 1.7825              | .10960153 |
| L2 MM3         | 1.55                | 0         |
| L2 MM14        | 1.395               | .10960153 |
| L2 MMM3        | .89125001           | .05480077 |
| Total          | 1.4046875           | .35499858 |

| Analysis of Variance |            |    |            |       |          |
|----------------------|------------|----|------------|-------|----------|
| Source               | SS         | df | MS         | F     | Prob > F |
| Between groups       | .855139831 | 3  | .28504661  | 42.19 | 0.0017   |
| Within groups        | .027028115 | 4  | .006757029 |       |          |
| Total                | .882167946 | 7  | .126023992 |       |          |

Comparison of MDA (nmol/fresh weight) by *B. megaterium* CCT 7729 (L1); MM3 X *B. megaterium* CCT 7730 (L2); MM3, MM14 and MMM3

(Bonferroni)

| Row Mean- |         |         |         |  |
|-----------|---------|---------|---------|--|
| Col Mean  | L1 MM3  | L2 MM3  | L2 MM14 |  |
| L2 MM3    | -.2325  |         |         |  |
|           | 0.285   |         |         |  |
|           |         |         |         |  |
| L2 MM14   | -.3875  | -.155   |         |  |
|           | 0.055   | 0.795   |         |  |
|           |         |         |         |  |
| L2 MMM3   | -.89125 | -.65875 | -.50375 |  |
|           | 0.002   | 0.008   | 0.022   |  |

**Section 4.4**

MDA; *B. megaterium* CCT 7729 (L1); MM3 X *B. megaterium* CCT 7730 (L2); MMM14, MMC3 and MMC14; bonferroni means st

Bartlett's test for equal variances:  $\chi^2(3) = 0.3923$  Prob> $\chi^2 = 0.942$

| Summary of MDA |                     |           |
|----------------|---------------------|-----------|
| L1 x L2        | (nmol/fresh weight) |           |
|                | Mean                | Std. Dev. |
| L1 MM3         | 1.7825              | .10960153 |
| L2 MMM14       | 1.705               | .10960153 |
| L2 MMC3        | .50375001           | .05480079 |
| L2 MMC14       | 1.3175              | .10960153 |
| Total          | 1.3271875           | .54712633 |

| Analysis of Variance |            |    |            |       |          |
|----------------------|------------|----|------------|-------|----------|
| Source               | SS         | df | MS         | F     | Prob > F |
| Between groups       | 2.05638992 | 3  | .685463308 | 70.23 | 0.0006   |
| Within groups        | .039040613 | 4  | .009760153 |       |          |
| Total                | 2.09543054 | 7  | .299347219 |       |          |

Comparison of MDA (nmol/fresh weight) by *B. megaterium* CCT 7729 (L1); MM3 X *B. megaterium* CCT 7730 (L2); MMM14, MMC3 and MMC14

(Bonferroni)

| Row Mean- |          |          |         |
|-----------|----------|----------|---------|
| Col Mean  | L1 MM3   | L2 MMM14 | L2 MMC3 |
| L2 MMM14  | -.0775   |          |         |
|           | 1.000    |          |         |
|           |          |          |         |
| L2 MMC3   | -1.27875 | -1.20125 |         |
|           | 0.001    | 0.002    |         |
|           |          |          |         |
| L2 MMC14  | -.465    | -.3875   | .81375  |
|           | 0.056    | 0.103    | 0.007   |

#### Section 4.5

MDA; *B. megaterium* CCT 7729 (L1); MM14 X *B. megaterium* CCT 7730 (L2); MM3, MM14 and MMM3, bonferroni means st



Bartlett's test for equal variances:  $\chi^2(2) = 0.9184$  Prob> $\chi^2 = 0.632$

| Summary of MDA<br>(nmol/fresh weight) |           |           |
|---------------------------------------|-----------|-----------|
| L1 X L2                               | Mean      | Std. Dev. |
| L1 MM14                               | .43916667 | .04474465 |
| L2 MM3                                | 1.55      | 0         |
| L2 MM14                               | 1.395     | .10960153 |
| L2 MMM3                               | .89125001 | .05480077 |
| Total                                 | .99888888 | .48776451 |

| Analysis of Variance |            |    |            |        |          |
|----------------------|------------|----|------------|--------|----------|
| Source               | SS         | df | MS         | F      | Prob > F |
| Between groups       | 1.88429396 | 3  | .628097987 | 165.12 | 0.0000   |
| Within groups        | .019019788 | 5  | .003803958 |        |          |
| Total                | 1.90331375 | 8  | .237914219 |        |          |

Comparison of MDA (nmol/fresh weight) by *B. megaterium* CCT 7729 (L1); MM14 X *B. megaterium* CCT 7730 (L2); MM3, MM14 and MMM3

(Bonferroni)

| Row Mean- |         |         |         |  |
|-----------|---------|---------|---------|--|
| Col Mean  | L1 MM14 | L2 MM3  | L2 MM14 |  |
| L2 MM3    | 1.11083 |         |         |  |
|           | 0.000   |         |         |  |
|           |         |         |         |  |
| L2 MM14   | .955833 | -.155   |         |  |
|           | 0.000   | 0.322   |         |  |
|           |         |         |         |  |
| L2 MMM3   | .452083 | -.65875 | -.50375 |  |
|           | 0.003   | 0.001   | 0.003   |  |

**Section 4.6**

MDA; *B. megaterium* CCT 7729 (L1); MM14 X *B. megaterium* CCT 7730 (L2); MMM14, MMC3 and MMC14; bonferroni means st

Bartlett's test for equal variances:  $\chi^2(3) = 1.2205$  Prob> $\chi^2 = 0.748$

| Summary of MDA |                     |           |
|----------------|---------------------|-----------|
| L1 X L2        | (nmol/fresh weight) |           |
|                | Mean                | Std. Dev. |
| L1 MM14        | .43916667           | .04474465 |
| L2 MMM14       | 1.705               | .10960153 |
| L2 MMC3        | .50375001           | .05480079 |
| L2 MMC14       | 1.3175              | .10960153 |
| Total          | .93000001           | .57213691 |

| Analysis of Variance |            |    |            |        |          |
|----------------------|------------|----|------------|--------|----------|
| Source               | SS         | df | MS         | F      | Prob > F |
| Between groups       | 2.58769282 | 3  | .862564273 | 138.98 | 0.0000   |
| Within groups        | .031032286 | 5  | .006206457 |        |          |
| Total                | 2.6187251  | 8  | .327340638 |        |          |

Comparison of MDA (nmol/fresh weight) by *B. megaterium* CCT 7729 (L1); MM14 X *B. megaterium* CCT 7730 (L2); MMM14, MMC3 and MMC14

(Bonferroni)

| Row Mean- | Col Mean | L1 MM14 | L2 MMM14 | L2 MMC3 |
|-----------|----------|---------|----------|---------|
| L2 MMM14  | 1.26583  | 0.000   |          |         |
| L2 MMC3   | .064583  | 1.000   | -1.20125 | 0.000   |
| L2 MMC14  | .878333  | 0.000   | -.3875   | .81375  |

#### Section 4.7

MDA; *B. megaterium* CCT 7729 (L1); MMM3 X *B. megaterium* CCT 7730 (L2); MM3, MM14 and MMM3; bonferroni means st

Bartlett's test for equal variances:  $\chi^2(2) = 0.3622$  Prob> $\chi^2 = 0.834$

| Summary of MDA<br>(nmol/fresh weight) |           |           |
|---------------------------------------|-----------|-----------|
| L1 X L2                               | Mean      | Std. Dev. |
| L1 MMM3                               | 2.2475001 | .10960153 |
| L2 MM3                                | 1.55      | 0         |
| L2 MM14                               | 1.395     | .10960153 |
| L2 MMM3                               | .89125001 | .05480077 |
| Total                                 | 1.5209375 | .52225293 |

| Analysis of Variance |            |    |            |       |          |
|----------------------|------------|----|------------|-------|----------|
| Source               | SS         | df | MS         | F     | Prob > F |
| Between groups       | 1.88220874 | 3  | .627402914 | 92.85 | 0.0004   |
| Within groups        | .027028115 | 4  | .006757029 |       |          |
| Total                | 1.90923686 | 7  | .272748122 |       |          |

Comparison of MDA (nmol/fresh weight) by *B. megaterium* CCT 7729 (L1); MMM3 X *B. megaterium* CCT 7730 (L2); MM3, MM14 and MMM3

(Bonferroni)

| Row Mean- |          |         |         |  |
|-----------|----------|---------|---------|--|
| Col Mean  | L1 MMM3  | L2 MM3  | L2 MM14 |  |
| L2 MM3    | -.6975   |         |         |  |
|           | 0.006    |         |         |  |
|           |          |         |         |  |
| L2 MM14   | -.8525   | -.155   |         |  |
|           | 0.003    | 0.795   |         |  |
|           |          |         |         |  |
| L2 MMM3   | -1.35625 | -.65875 | -.50375 |  |
|           | 0.000    | 0.008   | 0.022   |  |

**Section 4.8**

MDA; *B. megaterium* CCT 7729 (L1); MMM3 X *B. megaterium* CCT 7730 (L2); MMM14, MMC3 and MMC14; bonferroni means st

Bartlett's test for equal variances:  $\chi^2(3) = 0.3923$  Prob> $\chi^2 = 0.942$

| Summary of MDA |                     |           |
|----------------|---------------------|-----------|
| L1 X L2        | (nmol/fresh weight) |           |
|                | Mean                | Std. Dev. |
| L1 MMM3        | 2.2475001           | .10960153 |
| L2 MMM14       | 1.705               | .10960153 |
| L2 MMC3        | .50375001           | .05480079 |
| L2 MMC14       | 1.3175              | .10960153 |
| Total          | 1.4434375           | .68312825 |

| Analysis of Variance |            |    |            |        |          |
|----------------------|------------|----|------------|--------|----------|
| Source               | SS         | df | MS         | F      | Prob > F |
| Between groups       | 3.2276088  | 3  | 1.0758696  | 110.23 | 0.0003   |
| Within groups        | .039040613 | 4  | .009760153 |        |          |
| Total                | 3.26664941 | 7  | .466664202 |        |          |

Comparison of MDA (nmol/fresh weight) by *B. megaterium* CCT 7729 (L1); MMM3 X *B. megaterium* CCT 7730 (L2); MMM14, MMC3 and MMC14

(Bonferroni)

| Row Mean- |          |          |         |
|-----------|----------|----------|---------|
| Col Mean  | L1 MMM3  | L2 MMM14 | L2 MMC3 |
| L2 MMM14  | -.5425   |          |         |
|           | 0.032    |          |         |
|           |          |          |         |
| L2 MMC3   | -1.74375 | -1.20125 |         |
|           | 0.000    | 0.002    |         |
|           |          |          |         |
| L2 MMC14  | -.93     | -.3875   | .81375  |
|           | 0.004    | 0.103    | 0.007   |

#### Section 4.9

MDA; *B. megaterium* CCT 7729 (L1); MMM14 X *B. megaterium* CCT 7730 (L2); MM3, MM14 and MMM3; bonferroni means st



Bartlett's test for equal variances:  $\chi^2(2) = 0.3622$  Prob> $\chi^2 = 0.834$

| Summary of MDA<br>(nmol/fresh weight) |           |           |
|---------------------------------------|-----------|-----------|
| L1 X L2                               | Mean      | Std. Dev. |
| L1 MMM14                              | .77500001 | .10960157 |
| L2 MM3                                | 1.55      | 0         |
| L2 MM14                               | 1.395     | .10960153 |
| L2 MMM3                               | .89125001 | .05480077 |
| Total                                 | 1.1528125 | .35499856 |

| Analysis of Variance |            |    |            |       |          |
|----------------------|------------|----|------------|-------|----------|
| Source               | SS         | df | MS         | F     | Prob > F |
| Between groups       | .855139726 | 3  | .285046575 | 42.19 | 0.0017   |
| Within groups        | .027028124 | 4  | .006757031 |       |          |
| Total                | .88216785  | 7  | .126023979 |       |          |

Comparison of MDA (nmol/fresh weight) by *B. megaterium* CCT 7729 (L1); MMM14 X *B. megaterium* CCT 7730 (L2); MM3, MM14 and MMM3

(Bonferroni)

| Row Mean- |          |         |         |  |
|-----------|----------|---------|---------|--|
| Col Mean  | L1 MMM14 | L2 MM3  | L2 MM14 |  |
| L2 MM3    | .775     |         |         |  |
|           | 0.004    |         |         |  |
|           |          |         |         |  |
| L2 MM14   | .62      | -.155   |         |  |
|           | 0.010    | 0.795   |         |  |
|           |          |         |         |  |
| L2 MMM3   | .11625   | -.65875 | -.50375 |  |
|           | 1.000    | 0.008   | 0.022   |  |

**Section 4.10**

MDA; *B. megaterium* CCT 7729 (L1); MMM14 X *B. megaterium* CCT 7730 (L2); MMM14, MMC3 and MMC14; bonferroni means st

Bartlett's test for equal variances:  $\chi^2(3) = 0.3923$  Prob> $\chi^2 = 0.942$

| Summary of MDA |                     |           |
|----------------|---------------------|-----------|
| L1 X L2        | (nmol/fresh weight) |           |
|                | Mean                | Std. Dev. |
| L1 MMM14       | .77500001           | .10960157 |
| L2 MMM14       | 1.705               | .10960153 |
| L2 MMC3        | .50375001           | .05480079 |
| L2 MMC14       | 1.3175              | .10960153 |
| Total          | 1.0753125           | .5047072  |

| Analysis of Variance |            |    |            |       |          |
|----------------------|------------|----|------------|-------|----------|
| Source               | SS         | df | MS         | F     | Prob > F |
| Between groups       | 1.74406491 | 3  | .581354971 | 59.56 | 0.0009   |
| Within groups        | .039040622 | 4  | .009760156 |       |          |
| Total                | 1.78310554 | 7  | .254729362 |       |          |

Comparison of MDA (nmol/fresh weight) by *B. megaterium* CCT 7729 (L1); MMM14 X *B. megaterium* CCT 7730 (L2); MMM14, MMC3 and MMC14

(Bonferroni)

| Row Mean- |          |          |         |
|-----------|----------|----------|---------|
| Col Mean  | L1 MMM14 | L2 MMM14 | L2 MMC3 |
| L2 MMM14  | .93      |          |         |
|           | 0.004    |          |         |
|           |          |          |         |
| L2 MMC3   | -.27125  | -1.20125 |         |
|           | 0.310    | 0.002    |         |
|           |          |          |         |
| L2 MMC14  | .5425    | -.3875   | .81375  |
|           | 0.032    | 0.103    | 0.007   |

**Section 4.11**

MDA; *B. megaterium* CCT 7729 (L1); MMC3 X *B. megaterium* CCT 7730 (L2); MM3, MM14 and MMM3; bonferroni means st

Bartlett's test for equal variances:  $\chi^2(2) = 1.9904$  Prob> $\chi^2 = 0.370$

| Summary of MDA<br>(nmol/fresh weight) |           |           |
|---------------------------------------|-----------|-----------|
| L1 X L2                               | Mean      | Std. Dev. |
| L1 MMC3                               | 2.17      | .32880459 |
| L2 MM3                                | 1.55      | 0         |
| L2 MM14                               | 1.395     | .10960153 |
| L2 MMM3                               | .89125001 | .05480077 |
| Total                                 | 1.5015625 | .50555649 |

| Analysis of Variance |            |    |            |       |          |
|----------------------|------------|----|------------|-------|----------|
| Source               | SS         | df | MS         | F     | Prob > F |
| Between groups       | 1.66598344 | 3  | .555327814 | 18.04 | 0.0087   |
| Within groups        | .12312808  | 4  | .03078202  |       |          |
| Total                | 1.78911152 | 7  | .25558736  |       |          |

Comparison of MDA (nmol/fresh weight) by *B. megaterium* CCT 7729 (L1); MMC3 X *B. megaterium* CCT 7730 (L2); MM3, MM14 and MMM3

(Bonferroni)

| Row Mean- |          |         |         |  |
|-----------|----------|---------|---------|--|
| Col Mean  | L1 MMC3  | L2 MM3  | L2 MM14 |  |
| L2 MM3    | -.62     |         |         |  |
|           | 0.145    |         |         |  |
|           |          |         |         |  |
| L2 MM14   | -.775    | -.155   |         |  |
|           | 0.069    | 1.000   |         |  |
|           |          |         |         |  |
| L2 MMM3   | -1.27875 | -.65875 | -.50375 |  |
|           | 0.011    | 0.119   | 0.272   |  |

**Section 4.12**

MDA; *B. megaterium* CCT 7729 (L1); MMC3 X *B. megaterium* CCT 7730 (L2); MMM14, MMC3 and MMC14; bonferroni means st

Bartlett's test for equal variances:  $\chi^2(3) = 2.3473$  Prob> $\chi^2 = 0.504$

| Summary of MDA |                     |           |
|----------------|---------------------|-----------|
| L1 X L2        | (nmol/fresh weight) |           |
|                | Mean                | Std. Dev. |
| L1 MMC3        | 2.17                | .32880459 |
| L2 MMM14       | 1.705               | .10960153 |
| L2 MMC3        | .50375001           | .05480079 |
| L2 MMC14       | 1.3175              | .10960153 |
| Total          | 1.4240625           | .66788569 |

| Analysis of Variance |            |    |            |       |          |
|----------------------|------------|----|------------|-------|----------|
| Source               | SS         | df | MS         | F     | Prob > F |
| Between groups       | 2.98735847 | 3  | .995786158 | 29.47 | 0.0035   |
| Within groups        | .135140577 | 4  | .033785144 |       |          |
| Total                | 3.12249905 | 7  | .446071293 |       |          |

Comparison of MDA (nmol/fresh weight) by *B. megaterium* CCT 7729 (L1); MMC3 X *B. megaterium* CCT 7730 (L2); MMM14, MMC3 and MMC14

(Bonferroni)

| Row Mean- |          |          |         |
|-----------|----------|----------|---------|
| Col Mean  | L1 MMC3  | L2 MMM14 | L2 MMC3 |
| L2 MMM14  | -.465    |          |         |
|           | 0.388    |          |         |
|           |          |          |         |
| L2 MMC3   | -1.66625 | -1.20125 |         |
|           | 0.005    | 0.017    |         |
|           |          |          |         |
| L2 MMC14  | -.8525   | -.3875   | .81375  |
|           | 0.058    | 0.616    | 0.069   |

**Section 4.13**

MDA; *B. megaterium* CCT 7729 (L1); MMC14 X *B. megaterium* CCT 7730 (L2); MM3, MM14 and MMM3; bonferroni means st



Bartlett's test for equal variances:  $\chi^2(2) = 0.7185$  Prob> $\chi^2 = 0.698$

| Summary of MDA<br>(nmol/fresh weight) |           |           |
|---------------------------------------|-----------|-----------|
| L1 X L2                               | Mean      | Std. Dev. |
| L1 MMC14                              | .27124999 | .16440232 |
| L2 MM3                                | 1.55      | 0         |
| L2 MM14                               | 1.395     | .10960153 |
| L2 MMM3                               | .89125001 | .05480077 |
| Total                                 | 1.026875  | .53972503 |

| Analysis of Variance |            |    |            |       |          |
|----------------------|------------|----|------------|-------|----------|
| Source               | SS         | df | MS         | F     | Prob > F |
| Between groups       | 1.99707801 | 3  | .665692669 | 63.33 | 0.0008   |
| Within groups        | .042043741 | 4  | .010510935 |       |          |
| Total                | 2.03912175 | 7  | .291303107 |       |          |

Comparison of MDA (nmol/fresh weight) by *B. megaterium* CCT 7729 (L1); MMC14 X *B. megaterium* CCT 7730 (L2); MM3, MM14 and MMM3

(Bonferroni)

| Row Mean- |          |         |         |  |
|-----------|----------|---------|---------|--|
| Col Mean  | L1 MMC14 | L2 MM3  | L2 MM14 |  |
| L2 MM3    | 1.27875  |         |         |  |
|           | 0.001    |         |         |  |
|           |          |         |         |  |
| L2 MM14   | 1.12375  | -.155   |         |  |
|           | 0.002    | 1.000   |         |  |
|           |          |         |         |  |
| L2 MMM3   | .62      | -.65875 | -.50375 |  |
|           | 0.023    | 0.018   | 0.048   |  |

**Section 4.14**

MDA; *B. megaterium* CCT 7729 (L1); MMC14 X *B. megaterium* CCT 7730 (L2); MMM14, MMC3 and MMC14; bonferroni means st

Bartlett's test for equal variances:  $\chi^2(3) = 0.7387$  Prob> $\chi^2 = 0.864$

| Summary of MDA |                     |           |
|----------------|---------------------|-----------|
| L1 X L2        | (nmol/fresh weight) |           |
|                | Mean                | Std. Dev. |
| L1 MMC14       | .27124999           | .16440232 |
| L2 MMM14       | 1.705               | .10960153 |
| L2 MMC3        | .50375001           | .05480079 |
| L2 MMC14       | 1.3175              | .10960153 |
| Total          | .94937501           | .63063426 |

| Analysis of Variance |            |    |            |       |          |
|----------------------|------------|----|------------|-------|----------|
| Source               | SS         | df | MS         | F     | Prob > F |
| Between groups       | 2.72984074 | 3  | .909946914 | 67.33 | 0.0007   |
| Within groups        | .054056239 | 4  | .01351406  |       |          |
| Total                | 2.78389698 | 7  | .397699569 |       |          |

Comparison of MDA (nmol/fresh weight) by *B. megaterium*  
 CCT 7729 (L1); MMC14 X *B. megaterium* CCT 7730 (L2); MMM14, MMC3 and  
 MMC14

(Bonferroni)

Row Mean-|

Col Mean | L1 MMC14 L2 MMM14 L2 MMC3

-----+-----

|          |  |         |          |        |
|----------|--|---------|----------|--------|
| L2 MMM14 |  | 1.43375 |          |        |
|          |  | 0.001   |          |        |
|          |  |         |          |        |
| L2 MMC3  |  | .2325   | -1.20125 |        |
|          |  | 0.697   | 0.003    |        |
|          |  |         |          |        |
| L2 MMC14 |  | 1.04625 | -.3875   | .81375 |
|          |  | 0.005   | 0.174    | 0.013  |
