# Supplementary material for: Bacillus megaterium strains derived from water and soil exhibit differential responses to the herbicide mesotrione
Source: PubMed Central journal article supplement (PMC5918998; doi:10.1371/journal.pone.0196166), 2018-04-25
Supplement: pone.0196166.s005.pdf [file pone.0196166.s005.pdf]

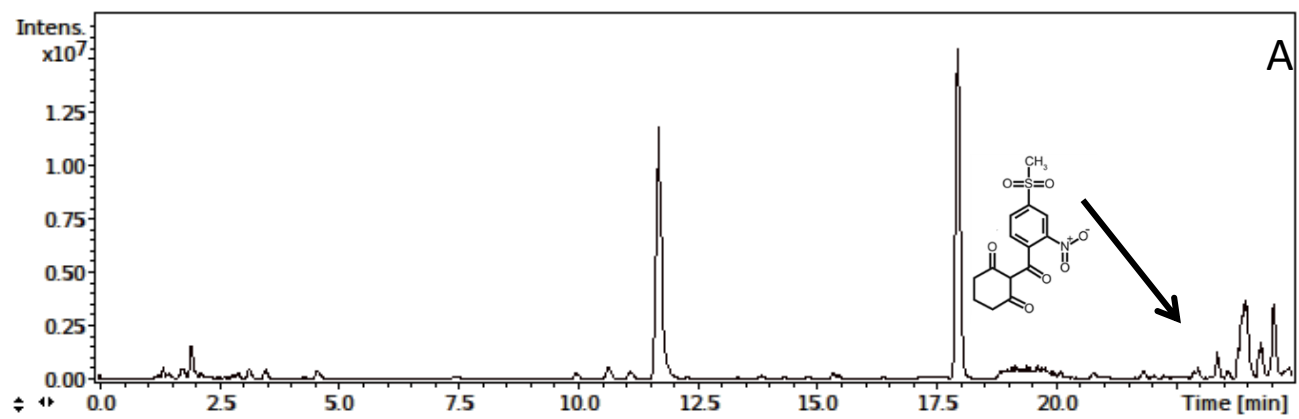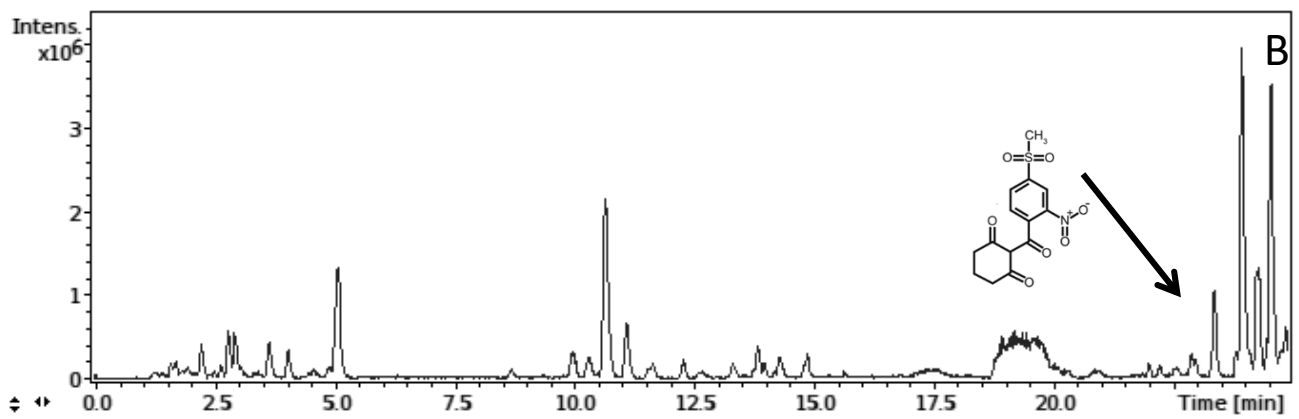

S1 Fig. Spectrogram 1.
