# Supplementary material for: Bacillus megaterium strains derived from water and soil exhibit differential responses to the herbicide mesotrione
Source: PubMed Central journal article supplement (PMC5918998; doi:10.1371/journal.pone.0196166), 2018-04-25
Supplement: pone.0196166.s010.pdf [file pone.0196166.s010.pdf]

**S1 Table. Quantitative analysis of infrared spectra.**

| T         | CH <sub>3</sub> /CH <sub>2</sub> |      |      | C=O   |      |       | (-CH <sub>2</sub> ) <sub>n</sub> |      |       |
|-----------|----------------------------------|------|------|-------|------|-------|----------------------------------|------|-------|
|           | M                                | S    | CV   | M     | S    | CV    | M                                | S    | CV    |
| <b>1</b>  | 42.56                            | 2.77 | 6.51 | 13.37 | 1.43 | 10.70 | 16.47                            | 1.02 | 6.21  |
| <b>2</b>  | 42.47                            | 2.94 | 6.92 | 14.87 | 2.37 | 15.94 | 15.07                            | 1.40 | 9.29  |
| <b>3</b>  | 42.67                            | 1.39 | 3.26 | 13.23 | 1.13 | 8.55  | 14.89                            | 0.84 | 5.66  |
| <b>4</b>  | 41.11                            | 3.53 | 8.58 | 15.48 | 0.96 | 6.17  | 16.22                            | 2.02 | 12.48 |
| <b>5</b>  | 40.78                            | 3.98 | 9.63 | 14.97 | 1.87 | 12.46 | 14.42                            | 0.50 | 3.46  |
| <b>6</b>  | 46.14                            | 3.56 | 7.70 | 14.62 | 0.87 | 5.93  | 15.81                            | 1.00 | 6.35  |
| <b>7</b>  | 40.50                            | 1.38 | 3.41 | 13.54 | 1.24 | 9.12  | 14.82                            | 1.64 | 11.04 |
| <b>8</b>  | 42.99                            | 3.34 | 7.59 | 12.92 | 1.05 | 8.10  | 14.54                            | 1.43 | 9.87  |
| <b>9</b>  | 40.32                            | 1.88 | 4.66 | 14.32 | 1.08 | 7.52  | 14.97                            | 0.27 | 1.77  |
| <b>10</b> | 42.30                            | 3.31 | 7.83 | 13.99 | 2.14 | 15.26 | 14.24                            | 0.73 | 5.14  |
| <b>11</b> | 37.49                            | 2.90 | 7.74 | 16.03 | 0.55 | 3.41  | 14.51                            | 0.55 | 3.77  |
| <b>12</b> | 40.76                            | 0.59 | 1.44 | 13.21 | 1.37 | 10.34 | 14.78                            | 1.00 | 6.79  |

|           | CH <sub>3</sub> |      |       | C-O   |      |       | (CH <sub>2</sub> ) <sub>n</sub> |      |        |
|-----------|-----------------|------|-------|-------|------|-------|---------------------------------|------|--------|
|           | M               | S    | CV    | M     | S    | CV    | M                               | S    | CV     |
| <b>1</b>  | 11.30           | 1.03 | 9.09  | 8.99  | 1.24 | 13.76 | 7.30                            | 1.02 | 13.94  |
| <b>2</b>  | 14.99           | 0.40 | 2.67  | 8.34  | 1.27 | 15.18 | 4.26                            | 3.69 | 86.71  |
| <b>3</b>  | 11.36           | 0.42 | 3.73  | 10.02 | 0.96 | 9.54  | 7.83                            | 0.37 | 4.74   |
| <b>4</b>  | 12.42           | 1.51 | 12.17 | 9.15  | 1.34 | 14.67 | 5.61                            | 4.94 | 87.93  |
| <b>5</b>  | 13.75           | 1.28 | 9.30  | 9.13  | 0.59 | 6.45  | 6.94                            | 0.45 | 6.41   |
| <b>6</b>  | 12.27           | 1.52 | 12.41 | 8.96  | 0.63 | 7.00  | 2.20                            | 3.81 | 173.21 |
| <b>7</b>  | 13.33           | 1.13 | 8.44  | 7.68  | 0.43 | 5.61  | 10.12                           | 1.03 | 10.13  |
| <b>8</b>  | 13.28           | 1.60 | 12.01 | 8.08  | 0.67 | 8.26  | 7.19                            | 0.70 | 9.70   |
| <b>9</b>  | 12.72           | 0.70 | 5.47  | 10.02 | 0.81 | 8.11  | 7.64                            | 0.79 | 10.32  |
| <b>10</b> | 12.49           | 0.52 | 4.12  | 9.49  | 0.73 | 7.73  | 7.49                            | 0.66 | 8.78   |
| <b>11</b> | 12.49           | 1.53 | 12.24 | 10.01 | 0.74 | 7.39  | 9.47                            | 1.14 | 11.99  |
| <b>12</b> | 14.45           | 1.13 | 7.81  | 8.70  | 0.79 | 9.09  | 8.09                            | 0.74 | 9.14   |
